# Supplementary material
Source: ML conference proceedings conference paper supplement (https://openaccess.thecvf.com/content/ICCV2023/html/Lee_Locomotion-Action-Manipulation_Synthesizing_Human-Scene_ICCV_2023_paper.html)
Supplement: Supplementary file 2 [file Lee_Locomotion-Action-Manipulation_Synthesizing_Human-Scene_ICCV_2023_supplemental.zip]

Archive with 2 entries (2 files):
- 06139-supp/supp-material.pdf
- 06139-supp/supp-video.mp4
